# Supplementary material for: All-atom, non-empirical, and tailor-made force field for α-RDX from first principles
Source: Royal Society of Chemistry journal article supplement (doi:10.1039/c4ra07195f), 2014-08-14
Supplement: c4ra07195f1.pdf [file c4ra07195f1.pdf]

**All-atom, Non-empirical, and Tailor-made Force Field for  $\alpha$ -RDX from First Principles  
(for Electronic Supplemental Information)**

Hua-Jie Song<sup>a</sup>, Yan-Geng Zhang<sup>a</sup>, Hua Li<sup>a</sup>, Tingting Zhou<sup>a\*</sup> and Feng-Lei Huang<sup>b\*</sup>

<sup>a</sup> Beijing Institute of Applied Physics and Computational Mathematics, Beijing, 100094

<sup>b</sup> State Key Laboratory of Explosion Science and Technology, Beijing Institute of Technology, Beijing 100081

\* Correspondence Authors: zhou\_tingting@iapcm.ac.cn or huangfl@bit.edu.cn

1. The atom positions for the gas RDX conformers and transition states obtained at the B3LYP/6-31G\* level of theory

(1) AAA

|   |              |              |              |
|---|--------------|--------------|--------------|
| N | -0.433701000 | 1.335838000  | 0.820977000  |
| C | 0.954751000  | 1.059281000  | 1.179248000  |
| N | 1.372141000  | -0.292611000 | 0.818609000  |
| C | 0.439884000  | -1.357690000 | 1.177422000  |
| N | -0.941108000 | -1.043010000 | 0.821176000  |
| C | -1.395423000 | 0.297485000  | 1.180745000  |
| H | -1.507977000 | 0.321642000  | 2.269351000  |
| H | -2.348890000 | 0.500602000  | 0.703388000  |
| H | 1.607257000  | 1.783879000  | 0.702246000  |
| H | 1.032369000  | 1.144700000  | 2.267912000  |
| H | 0.477300000  | -1.470368000 | 2.265733000  |
| H | 0.739755000  | -2.284013000 | 0.697454000  |
| N | -0.668637000 | 2.058432000  | -0.382198000 |
| O | -1.808992000 | 2.029153000  | -0.819986000 |
| O | 0.272086000  | 2.702152000  | -0.822290000 |
| N | -1.452298000 | -1.606928000 | -0.381599000 |
| O | -2.481930000 | -1.114622000 | -0.818114000 |
| O | -0.856940000 | -2.578605000 | -0.822393000 |
| N | 2.121079000  | -0.451220000 | -0.380378000 |
| O | 2.668479000  | 0.550586000  | -0.815965000 |
| O | 2.210120000  | -1.587965000 | -0.819587000 |

(2) AAE

|   |              |              |             |
|---|--------------|--------------|-------------|
| N | 1.259750000  | -0.000014000 | 0.104920000 |
| C | 0.774713000  | 1.242826000  | 0.730206000 |
| N | -0.673071000 | 1.217155000  | 0.784686000 |
| C | -1.259776000 | 0.000028000  | 1.343373000 |
| N | -0.673101000 | -1.217119000 | 0.784699000 |
| C | 0.774681000  | -1.242831000 | 0.730228000 |
| H | 1.107738000  | -2.093188000 | 0.146130000 |
| H | 1.143691000  | -1.332764000 | 1.761970000 |
| H | 1.143725000  | 1.332763000  | 1.761947000 |
| H | 1.107794000  | 2.093163000  | 0.146095000 |

|   |              |              |              |
|---|--------------|--------------|--------------|
| H | -2.332146000 | 0.000044000  | 1.177597000  |
| H | -1.045332000 | 0.000029000  | 2.415919000  |
| N | -1.354743000 | -1.801621000 | -0.330305000 |
| O | -2.547843000 | -1.561036000 | -0.416659000 |
| O | -0.699845000 | -2.545961000 | -1.043262000 |
| N | -1.354727000 | 1.801657000  | -0.330311000 |
| O | -2.547748000 | 1.560746000  | -0.416836000 |
| O | -0.699961000 | 2.546301000  | -1.043073000 |
| N | 2.618379000  | -0.000036000 | -0.241691000 |
| O | 3.146394000  | -1.095925000 | -0.392361000 |
| O | 3.146429000  | 1.095834000  | -0.392371000 |

(3) EEA

|   |              |              |              |
|---|--------------|--------------|--------------|
| N | 1.172370000  | -0.495827000 | 0.044599000  |
| C | 1.221159000  | 0.676299000  | 0.931362000  |
| N | -0.000074000 | 1.440345000  | 0.766677000  |
| C | -1.221200000 | 0.676138000  | 0.931385000  |
| N | -1.172260000 | -0.495972000 | 0.044605000  |
| C | 0.000110000  | -1.364635000 | 0.155009000  |
| H | 0.000155000  | -2.073579000 | -0.666030000 |
| H | 0.000142000  | -1.918384000 | 1.110450000  |
| H | 1.279784000  | 0.378772000  | 1.987177000  |
| H | 2.080487000  | 1.283256000  | 0.671020000  |
| H | -2.080599000 | 1.283003000  | 0.671050000  |
| H | -1.279799000 | 0.378594000  | 1.987196000  |
| N | -2.385593000 | -1.170719000 | -0.141818000 |
| O | -3.405475000 | -0.541301000 | 0.114592000  |
| O | -2.316478000 | -2.317181000 | -0.569230000 |
| N | -0.000190000 | 2.341436000  | -0.357918000 |
| O | -1.092774000 | 2.707927000  | -0.756080000 |
| O | 1.092240000  | 2.708453000  | -0.756024000 |
| N | 2.385784000  | -1.170427000 | -0.141822000 |
| O | 2.316799000  | -2.316974000 | -0.569027000 |
| O | 3.405582000  | -0.540964000 | 0.114811000  |

(4) EEE

|   |              |              |              |
|---|--------------|--------------|--------------|
| N | -1.307226000 | -0.320357000 | -0.095225000 |
| C | -0.402907000 | -1.384822000 | 0.328372000  |
| N | 0.931369000  | -0.971238000 | -0.095045000 |
| C | 1.399771000  | 0.343178000  | 0.332108000  |
| N | 0.375850000  | 1.291925000  | -0.093580000 |
| C | -0.997387000 | 1.040386000  | 0.331972000  |
| H | -1.661948000 | 1.734843000  | -0.170143000 |
| H | -1.106972000 | 1.153724000  | 1.424985000  |
| H | -0.448262000 | -1.540289000 | 1.420804000  |
| H | -0.671056000 | -2.305962000 | -0.177220000 |

|   |              |              |              |
|---|--------------|--------------|--------------|
| H | 2.333225000  | 0.572388000  | -0.170108000 |
| H | 1.553087000  | 0.380099000  | 1.425144000  |
| N | 0.767360000  | 2.636786000  | -0.100501000 |
| O | 1.972744000  | 2.855221000  | -0.117705000 |
| O | -0.132441000 | 3.468018000  | -0.118511000 |
| N | 1.900392000  | -1.982538000 | -0.100032000 |
| O | 3.070206000  | -1.618694000 | -0.115070000 |
| O | 1.487111000  | -3.135751000 | -0.118249000 |
| N | -2.667634000 | -0.653802000 | -0.099794000 |
| O | -3.459574000 | 0.280873000  | -0.115513000 |
| O | -2.937511000 | -1.848752000 | -0.117319000 |

(5) twist

|   |              |              |              |
|---|--------------|--------------|--------------|
| N | 0.325295000  | -1.040669000 | 0.233983000  |
| C | -0.472120000 | -0.708211000 | -0.966525000 |
| N | -1.455982000 | 0.287989000  | -0.592156000 |
| C | -0.930683000 | 1.564947000  | -0.087908000 |
| N | 0.353069000  | 1.341834000  | 0.590815000  |
| C | 0.488146000  | 0.035976000  | 1.220916000  |
| H | -0.299064000 | -0.030754000 | 1.976612000  |
| H | 1.458840000  | -0.069438000 | 1.697078000  |
| H | 0.155788000  | -0.282114000 | -1.757216000 |
| H | -0.967046000 | -1.596931000 | -1.344943000 |
| H | -1.662298000 | 1.980223000  | 0.603321000  |
| H | -0.762884000 | 2.261619000  | -0.908213000 |
| N | 1.417632000  | -1.879106000 | 0.007159000  |
| O | 1.433620000  | -2.441402000 | -1.085405000 |
| O | 2.217198000  | -2.019418000 | 0.923119000  |
| N | 1.507658000  | 1.812408000  | -0.096597000 |
| O | 2.566949000  | 1.270983000  | 0.185836000  |
| O | 1.344502000  | 2.753116000  | -0.862202000 |
| N | -2.629898000 | -0.210498000 | 0.041624000  |
| O | -2.875033000 | -1.396318000 | -0.117475000 |
| O | -3.319714000 | 0.607715000  | 0.636209000  |

(6) twist\_e

|   |              |              |              |
|---|--------------|--------------|--------------|
| N | 1.456039000  | 0.288037000  | -0.592293000 |
| C | 0.472113000  | -0.708261000 | -0.966331000 |
| N | -0.325294000 | -1.040551000 | 0.234197000  |
| C | -0.488254000 | 0.036132000  | 1.221037000  |
| N | -0.352895000 | 1.342102000  | 0.591052000  |
| C | 0.930836000  | 1.564986000  | -0.087886000 |
| H | 1.662495000  | 1.980038000  | 0.603307000  |
| H | 0.762884000  | 2.261620000  | -0.908110000 |
| H | -0.155781000 | -0.282372000 | -1.757105000 |
| H | 0.967151000  | -1.596964000 | -1.344504000 |

|   |              |              |              |
|---|--------------|--------------|--------------|
| H | 0.298798000  | -0.030602000 | 1.976857000  |
| H | -1.459045000 | -0.069113000 | 1.696904000  |
| N | 2.629620000  | -0.210803000 | 0.041563000  |
| O | 2.874005000  | -1.396779000 | -0.117437000 |
| O | 3.320171000  | 0.606992000  | 0.635909000  |
| N | -1.507231000 | 1.812504000  | -0.096568000 |
| O | -1.343919000 | 2.752874000  | -0.862580000 |
| O | -2.566708000 | 1.271527000  | 0.186162000  |
| N | -1.417616000 | -1.879020000 | 0.007286000  |
| O | -1.434167000 | -2.440349000 | -1.085750000 |
| O | -2.217259000 | -2.019968000 | 0.923079000  |

(7) AAA-AAE

|   |              |              |              |
|---|--------------|--------------|--------------|
| N | -1.313915000 | -0.000497000 | 0.537944000  |
| C | -0.725250000 | 1.247480000  | 0.997386000  |
| N | 0.722223000  | 1.222108000  | 0.823300000  |
| C | 1.383288000  | 0.000465000  | 1.285268000  |
| N | 0.723133000  | -1.221630000 | 0.823253000  |
| C | -0.724341000 | -1.248116000 | 0.997249000  |
| H | -0.914430000 | -1.378778000 | 2.070135000  |
| H | -1.152269000 | -2.075756000 | 0.440271000  |
| H | -1.153859000 | 2.074866000  | 0.440526000  |
| H | -0.915360000 | 1.377853000  | 2.070299000  |
| H | 1.331726000  | 0.000409000  | 2.377916000  |
| H | 2.419268000  | 0.000838000  | 0.962123000  |
| N | -2.430760000 | -0.000767000 | -0.290383000 |
| O | -2.876734000 | -1.097108000 | -0.609015000 |
| O | -2.877456000 | 1.095451000  | -0.608380000 |
| N | 1.226113000  | -1.802387000 | -0.381797000 |
| O | 0.472374000  | -2.553585000 | -0.982347000 |
| O | 2.389395000  | -1.554493000 | -0.655901000 |
| N | 1.224511000  | 1.803168000  | -0.381896000 |
| O | 0.469819000  | 2.553380000  | -0.982478000 |
| O | 2.388052000  | 1.556558000  | -0.656084000 |

(8) AAE-EEA

|   |              |              |              |
|---|--------------|--------------|--------------|
| N | 1.240685000  | -0.340449000 | 0.048859000  |
| C | 1.166047000  | 0.887666000  | 0.862033000  |
| N | -0.176915000 | 1.431106000  | 0.788172000  |
| C | -1.230480000 | 0.482927000  | 1.124605000  |
| N | -1.051024000 | -0.734385000 | 0.346872000  |
| C | 0.244171000  | -1.382037000 | 0.342128000  |
| H | 0.265593000  | -2.137222000 | -0.436894000 |
| H | 0.451212000  | -1.856674000 | 1.316155000  |
| H | 1.374687000  | 0.678369000  | 1.920113000  |
| H | 1.881846000  | 1.607215000  | 0.481808000  |

|   |              |              |              |
|---|--------------|--------------|--------------|
| H | -2.205060000 | 0.906314000  | 0.906926000  |
| H | -1.140063000 | 0.277914000  | 2.198800000  |
| N | -2.152524000 | -1.401524000 | -0.179468000 |
| O | -3.243193000 | -0.867713000 | -0.014469000 |
| O | -1.931635000 | -2.460721000 | -0.755458000 |
| N | -0.436784000 | 2.230500000  | -0.380383000 |
| O | -1.609063000 | 2.374957000  | -0.685416000 |
| O | 0.532595000  | 2.747066000  | -0.910120000 |
| N | 2.533430000  | -0.828105000 | -0.179873000 |
| O | 2.623113000  | -2.005820000 | -0.508903000 |
| O | 3.452593000  | -0.026175000 | -0.059229000 |

(9) AAE-EEA\_e

|   |              |              |              |
|---|--------------|--------------|--------------|
| N | 1.050587000  | -0.735267000 | 0.348103000  |
| C | 1.230488000  | 0.482247000  | 1.125343000  |
| N | 0.177616000  | 1.431009000  | 0.788350000  |
| C | -1.165694000 | 0.888371000  | 0.861935000  |
| N | -1.240867000 | -0.339960000 | 0.049207000  |
| C | -0.244988000 | -1.382106000 | 0.342653000  |
| H | -0.266483000 | -2.137063000 | -0.436589000 |
| H | -0.452696000 | -1.856934000 | 1.316431000  |
| H | 1.139640000  | 0.277631000  | 2.199569000  |
| H | 2.205406000  | 0.904932000  | 0.907804000  |
| H | -1.880930000 | 1.608220000  | 0.481215000  |
| H | -1.374800000 | 0.679635000  | 1.920034000  |
| N | -2.533837000 | -0.826817000 | -0.180028000 |
| O | -3.452555000 | -0.024315000 | -0.059877000 |
| O | -2.624184000 | -2.004527000 | -0.508882000 |
| N | 0.438251000  | 2.229832000  | -0.380498000 |
| O | -0.530697000 | 2.746768000  | -0.910635000 |
| O | 1.610673000  | 2.373462000  | -0.685327000 |
| N | 2.151631000  | -1.402094000 | -0.179618000 |
| O | 1.930227000  | -2.460983000 | -0.755968000 |
| O | 3.242456000  | -0.868457000 | -0.015143000 |

(10) EEA-EEE

|   |              |              |              |
|---|--------------|--------------|--------------|
| N | 1.170925000  | -0.654120000 | -0.096178000 |
| C | 1.247672000  | 0.707721000  | 0.437388000  |
| N | -0.001249000 | 1.348526000  | 0.076150000  |
| C | -1.248935000 | 0.705388000  | 0.437530000  |
| N | -1.169703000 | -0.656271000 | -0.096073000 |
| C | 0.001347000  | -1.451916000 | 0.267028000  |
| H | 0.002175000  | -2.370488000 | -0.309454000 |
| H | 0.001622000  | -1.697937000 | 1.343770000  |
| H | 1.391891000  | 0.697766000  | 1.531635000  |
| H | 2.071682000  | 1.234849000  | -0.031414000 |

|   |              |              |              |
|---|--------------|--------------|--------------|
| H | -2.073975000 | 1.231004000  | -0.031160000 |
| H | -1.392993000 | 0.695134000  | 1.531796000  |
| N | -2.381347000 | -1.359844000 | -0.106234000 |
| O | -3.403204000 | -0.685820000 | -0.048870000 |
| O | -2.307206000 | -2.578979000 | -0.202703000 |
| N | -0.002556000 | 2.725962000  | -0.135779000 |
| O | -1.099364000 | 3.264896000  | -0.225504000 |
| O | 1.093223000  | 3.266856000  | -0.226337000 |
| N | 2.383875000  | -1.355477000 | -0.106135000 |
| O | 2.312008000  | -2.574758000 | -0.202495000 |
| O | 3.404479000  | -0.679562000 | -0.048729000 |

(11) EEA-twist

|   |              |              |              |
|---|--------------|--------------|--------------|
| N | -1.048227000 | -1.007264000 | -0.600423000 |
| C | -0.000236000 | -1.846243000 | 0.000972000  |
| N | 1.048389000  | -1.007273000 | 0.601009000  |
| C | 0.609293000  | 0.282296000  | 1.106617000  |
| N | 0.000238000  | 1.023410000  | 0.000139000  |
| C | -0.608449000 | 0.281969000  | -1.106303000 |
| H | 0.113540000  | 0.088457000  | -1.907720000 |
| H | -1.447503000 | 0.844131000  | -1.505324000 |
| H | -0.467894000 | -2.471864000 | 0.759408000  |
| H | 0.466863000  | -2.473552000 | -0.756402000 |
| H | 1.448719000  | 0.844360000  | 1.504997000  |
| H | -0.112354000 | 0.089319000  | 1.908471000  |
| N | 0.000181000  | 2.393720000  | 0.000029000  |
| O | 0.449690000  | 2.940502000  | 1.005528000  |
| O | -0.449353000 | 2.940389000  | -1.005513000 |
| N | 2.302762000  | -0.994709000 | -0.080711000 |
| O | 3.037488000  | -0.046068000 | 0.147657000  |
| O | 2.554788000  | -1.965417000 | -0.782006000 |
| N | -2.303139000 | -0.994161000 | 0.080257000  |
| O | -3.037485000 | -0.045433000 | -0.148976000 |
| O | -2.555934000 | -1.964604000 | 0.781652000  |

(12) EEA-twist\_e

|   |              |              |              |
|---|--------------|--------------|--------------|
| N | 1.048227000  | 1.007264000  | 0.600423000  |
| C | 0.000236000  | 1.846243000  | -0.000972000 |
| N | -1.048389000 | 1.007273000  | -0.601009000 |
| C | -0.609293000 | -0.282296000 | -1.106617000 |
| N | -0.000238000 | -1.023410000 | -0.000139000 |
| C | 0.608449000  | -0.281969000 | 1.106303000  |
| H | -0.113540000 | -0.088457000 | 1.907720000  |
| H | 1.447503000  | -0.844131000 | 1.505324000  |
| H | 0.467894000  | 2.471864000  | -0.759408000 |
| H | -0.466863000 | 2.473552000  | 0.756402000  |

|   |              |              |              |
|---|--------------|--------------|--------------|
| H | -1.448719000 | -0.844360000 | -1.504997000 |
| H | 0.112354000  | -0.089319000 | -1.908471000 |
| N | -0.000181000 | -2.393720000 | -0.000029000 |
| O | -0.449690000 | -2.940502000 | -1.005528000 |
| O | 0.449353000  | -2.940389000 | 1.005513000  |
| N | -2.302762000 | 0.994709000  | 0.080711000  |
| O | -3.037488000 | 0.046068000  | -0.147657000 |
| O | -2.554788000 | 1.965417000  | 0.782006000  |
| N | 2.303139000  | 0.994161000  | -0.080257000 |
| O | 3.037485000  | 0.045433000  | 0.148976000  |
| O | 2.555934000  | 1.964604000  | -0.781652000 |

(13) boat

|   |              |              |              |
|---|--------------|--------------|--------------|
| N | -0.694888000 | 1.492963000  | 0.000000000  |
| C | -0.776737000 | 0.729671000  | 1.228729000  |
| N | 0.274339000  | -0.315614000 | 1.210787000  |
| C | 1.079831000  | -0.442995000 | 0.000000000  |
| N | 0.274339000  | -0.315614000 | -1.210787000 |
| C | -0.776737000 | 0.729671000  | -1.228729000 |
| H | -1.761665000 | 0.258285000  | -1.276375000 |
| H | -0.654991000 | 1.394688000  | -2.080160000 |
| H | -0.654991000 | 1.394688000  | 2.080160000  |
| H | -1.761665000 | 0.258285000  | 1.276375000  |
| H | 1.566496000  | -1.415179000 | 0.000000000  |
| H | 1.837529000  | 0.344854000  | 0.000000000  |
| N | 0.196265000  | 2.610917000  | 0.000000000  |
| O | 0.513068000  | 3.053799000  | 1.093196000  |
| O | 0.513068000  | 3.053799000  | -1.093196000 |
| N | -0.017579000 | -1.468102000 | -1.943090000 |
| O | -0.939161000 | -1.356809000 | -2.749323000 |
| O | 0.686523000  | -2.452542000 | -1.761551000 |
| N | -0.017579000 | -1.468102000 | 1.943090000  |
| O | -0.939161000 | -1.356809000 | 2.749323000  |
| O | 0.686523000  | -2.452542000 | 1.761551000  |

## 2. The Born–Mayer repulsion parameters

(Note: We found that  $\bar{S}$ -function expansion for RDX dimer converges at  $l = 1$ .)

| atom pair | $l_a k_a$ | $l_b k_b$ | $l$ | $\rho$    | $\alpha$ |
|-----------|-----------|-----------|-----|-----------|----------|
| C-C       | 00        | 00        | 0   | 5.274554  | 1.769427 |
|           | 00        | 10        | 1   | -0.077880 |          |
|           | 10        | 00        | 1   | -0.077880 |          |
| C-H       | 00        | 00        | 0   | 4.405158  | 1.878563 |
|           | 00        | 10        | 1   | -0.018652 |          |
|           | 10        | 00        | 1   | 0.014848  |          |

|     |    |    |   |           |          |
|-----|----|----|---|-----------|----------|
|     | 00 | 00 | 0 | 5.108723  |          |
| C-N | 00 | 10 | 1 | -0.089986 | 2.100451 |
|     | 10 | 00 | 1 | -0.122216 |          |
|     | 00 | 00 | 0 | 5.549693  |          |
| C-O | 00 | 10 | 1 | -0.144367 | 2.189134 |
|     | 10 | 00 | 1 | 0.008035  |          |
|     | 00 | 00 | 0 | 3.880241  |          |
| H-H | 00 | 10 | 1 | 0.056932  | 1.786859 |
|     | 10 | 00 | 1 | 0.056932  |          |
|     | 00 | 00 | 0 | 4.182617  |          |
| H-N | 00 | 10 | 1 | -0.302414 | 2.026678 |
|     | 10 | 00 | 1 | 0.025731  |          |
|     | 00 | 00 | 0 | 4.759655  |          |
| H-O | 00 | 10 | 1 | -0.020237 | 2.115238 |
|     | 10 | 00 | 1 | 0.123452  |          |
|     | 00 | 00 | 0 | 4.397317  |          |
| N-N | 00 | 10 | 1 | -0.475086 | 1.984348 |
|     | 10 | 00 | 1 | -0.475086 |          |
|     | 00 | 00 | 0 | 5.236072  |          |
| N-O | 00 | 10 | 1 | -0.156987 | 2.668108 |
|     | 10 | 00 | 1 | -0.126141 |          |
|     | 00 | 00 | 0 | 5.768799  |          |
| O-O | 00 | 10 | 1 | 0.007358  | 2.087284 |
|     | 10 | 00 | 1 | 0.007358  |          |

### 3. Energy ranks of low energy structures for 216 Space groups

(Note: The table gives the low energy structures for 216 space groups, since other 14 space groups failed to be built in the search.)

| Rank No. | Space group | Density (g/cm <sup>3</sup> ) | Total energy (kJ/mol) | <i>a</i> (Å) | <i>b</i> (Å) | <i>c</i> (Å) | <i>α</i> (deg) | <i>β</i> (deg) | <i>γ</i> (deg) |
|----------|-------------|------------------------------|-----------------------|--------------|--------------|--------------|----------------|----------------|----------------|
| 1        | PBCA        | 1.915                        | -38.510               | 13.029       | 11.264       | 10.498       | 90.0           | 90.0           | 90.0           |
| 2        | P21/C       | 1.901                        | -35.288               | 7.257        | 14.510       | 8.235        | 90.0           | 116.5          | 90.0           |
| 3        | P21         | 1.842                        | -35.223               | 7.333        | 6.119        | 9.120        | 90.0           | 78.1           | 90.0           |
| 4        | PNA21       | 1.865                        | -35.161               | 9.992        | 12.199       | 6.488        | 90.0           | 90.0           | 90.0           |
| 5        | P212121     | 1.871                        | -34.969               | 13.663       | 7.549        | 7.645        | 90.0           | 90.0           | 90.0           |
| 6        | P41212      | 1.853                        | -34.830               | 7.645        | 7.645        | 27.238       | 90.0           | 90.0           | 90.0           |
| 7        | PCA21       | 1.807                        | -34.729               | 12.226       | 7.643        | 8.737        | 90.0           | 90.0           | 90.0           |
| 8        | P43212      | 1.843                        | -34.562               | 7.638        | 7.638        | 27.444       | 90.0           | 90.0           | 90.0           |
| 9        | IBA2        | 1.840                        | -34.546               | 25.018       | 10.562       | 6.069        | 90.0           | 90.0           | 90.0           |
| 10       | P-1         | 1.870                        | -34.079               | 6.942        | 6.157        | 10.438       | 111.7          | 74.9           | 104.4          |
| 11       | C2/C        | 1.876                        | -34.035               | 12.744       | 7.242        | 19.612       | 90.0           | 119.7          | 90.0           |
| 12       | CC          | 1.895                        | -33.993               | 7.146        | 20.020       | 5.896        | 90.0           | 67.4           | 90.0           |
| 13       | FDD2        | 1.797                        | -33.700               | 44.392       | 9.625        | 7.685        | 90.0           | 90.0           | 90.0           |
| 14       | PCCN        | 1.815                        | -33.605               | 25.107       | 11.008       | 5.882        | 90.0           | 90.0           | 90.0           |



|    |        |       |         |        |        |        |       |       |       |
|----|--------|-------|---------|--------|--------|--------|-------|-------|-------|
| 15 | P42BC  | 1.796 | -33.536 | 16.717 | 16.717 | 5.878  | 90.0  | 90.0  | 90.0  |
| 16 | P-421C | 1.791 | -33.399 | 16.883 | 16.883 | 5.780  | 90.0  | 90.0  | 90.0  |
| 17 | P1     | 1.773 | -33.389 | 6.408  | 5.686  | 7.824  | 114.8 | 120.7 | 93.6  |
| 18 | PBCN   | 1.835 | -33.335 | 25.472 | 10.244 | 6.163  | 90.0  | 90.0  | 90.0  |
| 19 | ABA2   | 1.816 | -33.321 | 9.608  | 26.359 | 6.415  | 90.0  | 90.0  | 90.0  |
| 20 | P21212 | 1.828 | -33.226 | 8.527  | 13.050 | 7.253  | 90.0  | 90.0  | 90.0  |
| 21 | I-4    | 1.776 | -33.031 | 16.270 | 16.270 | 6.278  | 90.0  | 90.0  | 90.0  |
| 22 | C2     | 1.877 | -32.971 | 12.871 | 7.686  | 8.055  | 90.0  | 99.4  | 90.0  |
| 23 | P42/N  | 1.805 | -32.891 | 15.833 | 15.833 | 6.521  | 90.0  | 90.0  | 90.0  |
| 24 | R3C    | 1.822 | -32.615 | 25.706 | 25.706 | 6.366  | 90.0  | 90.0  | 120.0 |
| 25 | I41CD  | 1.762 | -32.566 | 24.107 | 24.107 | 5.763  | 90.0  | 90.0  | 90.0  |
| 26 | PC     | 1.733 | -32.464 | 6.297  | 11.982 | 5.785  | 90.0  | 77.2  | 90.0  |
| 27 | PCCA   | 1.868 | -32.405 | 24.603 | 7.878  | 8.152  | 90.0  | 90.0  | 90.0  |
| 28 | PCC2   | 1.874 | -32.393 | 12.296 | 7.888  | 8.118  | 90.0  | 90.0  | 90.0  |
| 29 | C2221  | 1.822 | -32.302 | 8.312  | 13.057 | 14.923 | 90.0  | 90.0  | 90.0  |
| 30 | PNN2   | 1.679 | -32.179 | 10.550 | 12.939 | 6.435  | 90.0  | 90.0  | 90.0  |
| 31 | P2/C   | 1.861 | -32.121 | 12.337 | 7.875  | 8.160  | 90.0  | 90.0  | 90.0  |
| 32 | P61    | 1.690 | -32.077 | 15.596 | 15.596 | 6.217  | 90.0  | 90.0  | 120.0 |
| 33 | R3     | 1.860 | -31.858 | 16.338 | 16.338 | 7.721  | 90.0  | 90.0  | 120.0 |
| 34 | P42    | 1.698 | -31.808 | 9.084  | 9.084  | 10.527 | 90.0  | 90.0  | 90.0  |
| 35 | I-43D  | 1.759 | -31.700 | 21.593 | 21.593 | 21.593 | 90.0  | 90.0  | 90.0  |
| 36 | R-3    | 1.449 | -31.576 | 29.066 | 29.066 | 6.260  | 90.0  | 90.0  | 120.0 |
| 37 | P65    | 1.685 | -31.518 | 15.569 | 15.569 | 6.259  | 90.0  | 90.0  | 120.0 |
| 38 | I4     | 1.710 | -31.480 | 15.935 | 15.935 | 6.797  | 90.0  | 90.0  | 90.0  |
| 39 | FDDD   | 1.852 | -31.470 | 19.813 | 24.476 | 13.140 | 90.0  | 90.0  | 90.0  |
| 40 | CCC2   | 1.767 | -31.389 | 11.590 | 25.521 | 5.647  | 90.0  | 90.0  | 90.0  |
| 41 | P-4    | 1.705 | -31.305 | 9.021  | 9.021  | 10.631 | 90.0  | 90.0  | 90.0  |
| 42 | P4122  | 1.752 | -31.272 | 9.214  | 9.214  | 19.840 | 90.0  | 90.0  | 90.0  |
| 43 | IBCA   | 1.724 | -31.062 | 22.727 | 5.843  | 25.772 | 90.0  | 90.0  | 90.0  |
| 44 | P42212 | 1.792 | -31.056 | 13.186 | 13.186 | 9.471  | 90.0  | 90.0  | 90.0  |
| 45 | P41    | 1.601 | -30.999 | 12.353 | 12.353 | 6.039  | 90.0  | 90.0  | 90.0  |
| 46 | I41/A  | 1.627 | -30.945 | 24.065 | 24.065 | 6.262  | 90.0  | 90.0  | 90.0  |
| 47 | P31C   | 1.793 | -30.871 | 14.805 | 14.805 | 6.502  | 90.0  | 90.0  | 120.0 |
| 48 | CMC21  | 1.662 | -30.770 | 28.694 | 9.655  | 6.407  | 90.0  | 90.0  | 90.0  |
| 49 | PBA2   | 1.752 | -30.759 | 11.518 | 11.263 | 6.491  | 90.0  | 90.0  | 90.0  |
| 50 | PNNA   | 1.760 | -30.675 | 5.679  | 25.401 | 11.620 | 90.0  | 90.0  | 90.0  |
| 51 | I222   | 1.635 | -30.617 | 10.678 | 14.719 | 11.484 | 90.0  | 90.0  | 90.0  |
| 52 | PNC2   | 1.714 | -30.585 | 6.409  | 22.485 | 5.975  | 90.0  | 90.0  | 90.0  |
| 53 | P4/NCC | 1.658 | -30.551 | 17.460 | 17.460 | 11.678 | 90.0  | 90.0  | 90.0  |
| 54 | P3121  | 1.731 | -30.528 | 7.375  | 7.375  | 27.138 | 90.0  | 90.0  | 120.0 |
| 55 | P64    | 1.603 | -30.514 | 14.960 | 14.960 | 7.125  | 90.0  | 90.0  | 120.0 |
| 56 | P43    | 1.614 | -30.465 | 12.116 | 12.116 | 6.226  | 90.0  | 90.0  | 90.0  |
| 57 | P-3C1  | 1.646 | -30.446 | 17.149 | 17.149 | 10.557 | 90.0  | 90.0  | 120.0 |
| 58 | P4/N   | 1.657 | -30.435 | 16.742 | 16.742 | 6.354  | 90.0  | 90.0  | 90.0  |

|     |         |       |         |        |        |        |      |       |       |
|-----|---------|-------|---------|--------|--------|--------|------|-------|-------|
| 59  | I-42D   | 1.673 | -30.289 | 12.175 | 12.175 | 23.790 | 90.0 | 90.0  | 90.0  |
| 60  | P62     | 1.573 | -29.909 | 15.050 | 15.050 | 7.171  | 90.0 | 90.0  | 120.0 |
| 61  | P-3     | 1.771 | -29.892 | 10.660 | 10.660 | 12.699 | 90.0 | 90.0  | 120.0 |
| 62  | P63     | 1.592 | -29.833 | 15.867 | 15.867 | 6.377  | 90.0 | 90.0  | 120.0 |
| 63  | R-3C    | 1.623 | -29.802 | 31.318 | 31.318 | 9.633  | 90.0 | 90.0  | 120.0 |
| 64  | P2      | 1.740 | -29.795 | 5.962  | 6.381  | 11.685 | 90.0 | 107.4 | 90.0  |
| 65  | P3221   | 1.709 | -29.766 | 7.459  | 7.459  | 26.876 | 90.0 | 90.0  | 120.0 |
| 66  | P2221   | 1.730 | -29.736 | 6.391  | 5.907  | 22.599 | 90.0 | 90.0  | 90.0  |
| 67  | PNMA    | 1.610 | -29.675 | 10.275 | 27.529 | 6.479  | 90.0 | 90.0  | 90.0  |
| 68  | P31     | 1.657 | -29.650 | 11.290 | 11.290 | 6.049  | 90.0 | 90.0  | 120.0 |
| 69  | P32     | 1.731 | -29.648 | 10.782 | 10.782 | 6.350  | 90.0 | 90.0  | 120.0 |
| 70  | PMN21   | 1.543 | -29.478 | 27.330 | 6.442  | 5.430  | 90.0 | 90.0  | 90.0  |
| 71  | P21/M   | 1.706 | -29.353 | 6.046  | 22.447 | 6.431  | 90.0 | 82.3  | 90.0  |
| 72  | ABM2    | 1.663 | -29.293 | 11.024 | 27.434 | 5.868  | 90.0 | 90.0  | 90.0  |
| 73  | P6122   | 1.694 | -29.279 | 7.339  | 7.339  | 56.029 | 90.0 | 90.0  | 120.0 |
| 74  | CCCA    | 1.703 | -28.991 | 21.657 | 26.586 | 6.019  | 90.0 | 90.0  | 90.0  |
| 75  | CMCA    | 1.648 | -28.984 | 27.363 | 5.875  | 22.279 | 90.0 | 90.0  | 90.0  |
| 76  | P-4C2   | 1.654 | -28.952 | 12.596 | 12.596 | 11.246 | 90.0 | 90.0  | 90.0  |
| 77  | CM      | 1.565 | -28.894 | 5.704  | 26.717 | 6.327  | 90.0 | 77.9  | 90.0  |
| 78  | P3112   | 1.715 | -28.827 | 6.985  | 6.985  | 30.533 | 90.0 | 90.0  | 120.0 |
| 79  | P6      | 1.581 | -28.764 | 15.865 | 15.865 | 6.420  | 90.0 | 90.0  | 120.0 |
| 80  | I41     | 1.663 | -28.711 | 18.326 | 18.326 | 5.282  | 90.0 | 90.0  | 90.0  |
| 81  | PA-3    | 1.627 | -28.588 | 17.587 | 17.587 | 17.587 | 90.0 | 90.0  | 90.0  |
| 82  | P4322   | 1.651 | -28.568 | 6.300  | 6.300  | 45.030 | 90.0 | 90.0  | 90.0  |
| 83  | P-4B2   | 1.735 | -28.474 | 11.742 | 11.742 | 12.338 | 90.0 | 90.0  | 90.0  |
| 84  | PBAN    | 1.693 | -28.428 | 5.838  | 22.491 | 13.270 | 90.0 | 90.0  | 90.0  |
| 85  | P213    | 1.714 | -28.421 | 13.719 | 13.719 | 13.719 | 90.0 | 90.0  | 90.0  |
| 86  | P4CC    | 1.598 | -28.367 | 14.802 | 14.802 | 8.427  | 90.0 | 90.0  | 90.0  |
| 87  | PBCM    | 1.576 | -28.328 | 6.448  | 10.382 | 27.971 | 90.0 | 90.0  | 90.0  |
| 88  | I-4C2   | 1.764 | -28.287 | 11.690 | 11.690 | 24.485 | 90.0 | 90.0  | 90.0  |
| 89  | PNNN    | 1.661 | -28.251 | 24.639 | 12.905 | 5.587  | 90.0 | 90.0  | 90.0  |
| 90  | IMA2    | 1.610 | -28.148 | 28.130 | 11.394 | 5.719  | 90.0 | 90.0  | 90.0  |
| 91  | P4NC    | 1.631 | -28.117 | 17.578 | 17.578 | 5.855  | 90.0 | 90.0  | 90.0  |
| 92  | C2/M    | 1.634 | -28.092 | 5.860  | 27.482 | 12.448 | 90.0 | 115.7 | 90.0  |
| 93  | P6CC    | 1.287 | -27.982 | 25.823 | 25.823 | 5.954  | 90.0 | 90.0  | 120.0 |
| 94  | P-4N2   | 1.682 | -27.965 | 17.457 | 17.457 | 5.756  | 90.0 | 90.0  | 90.0  |
| 95  | P-42C   | 1.472 | -27.931 | 12.697 | 12.697 | 12.438 | 90.0 | 90.0  | 90.0  |
| 96  | AMA2    | 1.594 | -27.859 | 25.173 | 13.117 | 5.608  | 90.0 | 90.0  | 90.0  |
| 97  | P4      | 1.657 | -27.712 | 11.780 | 11.780 | 6.416  | 90.0 | 90.0  | 90.0  |
| 98  | PNNM    | 1.562 | -27.473 | 6.446  | 10.158 | 28.847 | 90.0 | 90.0  | 90.0  |
| 99  | PMA2    | 1.656 | -27.443 | 22.920 | 6.073  | 6.401  | 90.0 | 90.0  | 90.0  |
| 100 | I41/ACD | 1.677 | -27.357 | 11.401 | 11.401 | 54.156 | 90.0 | 90.0  | 90.0  |
| 101 | C222    | 1.623 | -27.204 | 5.898  | 26.781 | 11.508 | 90.0 | 90.0  | 90.0  |
| 102 | IBAM    | 1.603 | -27.065 | 22.858 | 5.760  | 27.966 | 90.0 | 90.0  | 90.0  |

|     |         |       |         |        |        |        |      |      |       |
|-----|---------|-------|---------|--------|--------|--------|------|------|-------|
| 103 | P622    | 1.552 | -26.854 | 16.695 | 16.695 | 11.814 | 90.0 | 90.0 | 120.0 |
| 104 | P321    | 1.680 | -26.595 | 15.379 | 15.379 | 6.430  | 90.0 | 90.0 | 120.0 |
| 105 | P4/NNC  | 1.272 | -26.584 | 27.913 | 27.913 | 5.955  | 90.0 | 90.0 | 90.0  |
| 106 | P3C1    | 1.505 | -26.567 | 17.398 | 17.398 | 5.609  | 90.0 | 90.0 | 120.0 |
| 107 | P-31C   | 1.189 | -26.514 | 26.989 | 26.989 | 5.902  | 90.0 | 90.0 | 120.0 |
| 108 | FMM2    | 1.586 | -26.509 | 22.941 | 27.261 | 5.952  | 90.0 | 90.0 | 90.0  |
| 109 | P422    | 1.448 | -26.402 | 13.131 | 13.131 | 11.816 | 90.0 | 90.0 | 90.0  |
| 110 | P6522   | 1.566 | -26.287 | 9.746  | 9.746  | 34.352 | 90.0 | 90.0 | 120.0 |
| 111 | I212121 | 1.628 | -26.209 | 11.910 | 5.585  | 27.250 | 90.0 | 90.0 | 90.0  |
| 112 | FD-3    | 1.563 | -26.058 | 28.296 | 28.296 | 28.296 | 90.0 | 90.0 | 90.0  |
| 113 | P42/MBC | 1.604 | -26.009 | 11.386 | 11.386 | 28.387 | 90.0 | 90.0 | 90.0  |
| 114 | F222    | 1.633 | -25.976 | 26.409 | 24.842 | 5.510  | 90.0 | 90.0 | 90.0  |
| 115 | P6222   | 1.473 | -25.952 | 16.945 | 16.945 | 12.085 | 90.0 | 90.0 | 120.0 |
| 116 | P312    | 1.178 | -25.816 | 13.596 | 13.596 | 11.738 | 90.0 | 90.0 | 120.0 |
| 117 | I23     | 1.249 | -25.729 | 19.208 | 19.208 | 19.208 | 90.0 | 90.0 | 90.0  |
| 118 | P4212   | 1.555 | -25.675 | 18.401 | 18.401 | 5.605  | 90.0 | 90.0 | 90.0  |
| 119 | PMNA    | 1.584 | -25.652 | 24.955 | 12.821 | 5.822  | 90.0 | 90.0 | 90.0  |
| 120 | CCCM    | 1.593 | -25.604 | 22.442 | 6.058  | 27.252 | 90.0 | 90.0 | 90.0  |
| 121 | P-43N   | 1.484 | -25.415 | 18.137 | 18.137 | 18.137 | 90.0 | 90.0 | 90.0  |
| 122 | IA-3    | 1.654 | -25.400 | 22.038 | 22.038 | 22.038 | 90.0 | 90.0 | 90.0  |
| 123 | PMC21   | 1.498 | -25.084 | 15.333 | 10.962 | 5.861  | 90.0 | 90.0 | 90.0  |
| 124 | P6422   | 1.442 | -25.080 | 17.217 | 17.217 | 11.960 | 90.0 | 90.0 | 120.0 |
| 125 | I4122   | 1.345 | -25.054 | 27.259 | 27.259 | 5.905  | 90.0 | 90.0 | 90.0  |
| 126 | P222    | 1.584 | -25.051 | 5.528  | 13.083 | 12.876 | 90.0 | 90.0 | 90.0  |
| 127 | P42/NBC | 1.298 | -24.930 | 28.004 | 28.004 | 5.800  | 90.0 | 90.0 | 90.0  |
| 128 | PN-3    | 1.264 | -24.916 | 19.133 | 19.133 | 19.133 | 90.0 | 90.0 | 90.0  |
| 129 | PBAM    | 1.488 | -24.881 | 5.932  | 21.838 | 15.309 | 90.0 | 90.0 | 90.0  |
| 130 | P42CM   | 1.161 | -24.822 | 20.762 | 20.762 | 5.893  | 90.0 | 90.0 | 90.0  |
| 131 | PN-3N   | 1.305 | -24.652 | 23.847 | 23.847 | 23.847 | 90.0 | 90.0 | 90.0  |
| 132 | CMCM    | 1.513 | -24.640 | 23.878 | 5.856  | 27.887 | 90.0 | 90.0 | 90.0  |
| 133 | P3      | 1.605 | -24.502 | 11.153 | 11.153 | 6.401  | 90.0 | 90.0 | 120.0 |
| 134 | I4CM    | 1.269 | -24.464 | 28.133 | 28.133 | 5.874  | 90.0 | 90.0 | 90.0  |
| 135 | R32     | 1.430 | -24.396 | 19.981 | 19.981 | 13.432 | 90.0 | 90.0 | 120.0 |
| 136 | I422    | 1.227 | -24.362 | 27.928 | 27.928 | 6.168  | 90.0 | 90.0 | 90.0  |
| 137 | P42/NCM | 1.269 | -24.277 | 28.129 | 28.129 | 5.879  | 90.0 | 90.0 | 90.0  |
| 138 | FD-3C   | 1.133 | -24.169 | 39.690 | 39.690 | 39.690 | 90.0 | 90.0 | 90.0  |
| 139 | P4132   | 1.494 | -24.025 | 18.094 | 18.094 | 18.094 | 90.0 | 90.0 | 90.0  |
| 140 | P42/NMC | 1.125 | -23.914 | 29.886 | 29.886 | 5.873  | 90.0 | 90.0 | 90.0  |
| 141 | F432    | 1.289 | -23.888 | 30.175 | 30.175 | 30.175 | 90.0 | 90.0 | 90.0  |
| 142 | P63CM   | 1.143 | -23.883 | 27.577 | 27.577 | 5.881  | 90.0 | 90.0 | 120.0 |
| 143 | PCCM    | 1.510 | -23.795 | 11.665 | 12.660 | 13.231 | 90.0 | 90.0 | 90.0  |
| 144 | P4222   | 1.525 | -23.770 | 12.467 | 12.467 | 12.449 | 90.0 | 90.0 | 90.0  |
| 145 | P4332   | 1.485 | -23.747 | 18.132 | 18.132 | 18.132 | 90.0 | 90.0 | 90.0  |
| 146 | IA-3D   | 1.480 | -23.715 | 28.815 | 28.815 | 28.815 | 90.0 | 90.0 | 90.0  |

|     |         |       |         |        |        |        |      |      |       |
|-----|---------|-------|---------|--------|--------|--------|------|------|-------|
| 147 | F-43C   | 1.280 | -23.697 | 30.242 | 30.242 | 30.242 | 90.0 | 90.0 | 90.0  |
| 148 | R3M     | 1.221 | -23.635 | 31.385 | 31.385 | 6.376  | 90.0 | 90.0 | 120.0 |
| 149 | P42NM   | 1.267 | -23.501 | 18.731 | 18.731 | 6.636  | 90.0 | 90.0 | 90.0  |
| 150 | P2/M    | 1.464 | -23.289 | 11.293 | 15.379 | 5.805  | 90.0 | 91.8 | 90.0  |
| 151 | P42/M   | 1.372 | -23.267 | 8.996  | 8.996  | 26.565 | 90.0 | 90.0 | 90.0  |
| 152 | PM      | 1.366 | -23.177 | 6.414  | 15.696 | 5.370  | 90.0 | 92.9 | 90.0  |
| 153 | P-421M  | 1.384 | -22.852 | 18.214 | 18.214 | 6.426  | 90.0 | 90.0 | 90.0  |
| 154 | P6322   | 1.287 | -22.800 | 13.001 | 13.001 | 23.499 | 90.0 | 90.0 | 120.0 |
| 155 | P3212   | 1.370 | -22.709 | 17.416 | 17.416 | 6.150  | 90.0 | 90.0 | 120.0 |
| 156 | P6/MCC  | 1.334 | -22.683 | 16.639 | 16.639 | 27.677 | 90.0 | 90.0 | 120.0 |
| 157 | I4/M    | 1.380 | -22.646 | 12.675 | 12.675 | 26.622 | 90.0 | 90.0 | 90.0  |
| 158 | I213    | 1.561 | -22.550 | 17.833 | 17.833 | 17.833 | 90.0 | 90.0 | 90.0  |
| 159 | AMM2    | 1.425 | -22.276 | 15.339 | 22.808 | 5.919  | 90.0 | 90.0 | 90.0  |
| 160 | P63/M   | 1.003 | -22.046 | 13.643 | 13.643 | 27.366 | 90.0 | 90.0 | 120.0 |
| 161 | IMMA    | 1.364 | -21.979 | 26.527 | 27.652 | 5.897  | 90.0 | 90.0 | 90.0  |
| 162 | P-31M   | 1.111 | -21.782 | 27.983 | 27.983 | 5.873  | 90.0 | 90.0 | 120.0 |
| 163 | I41/AMD | 1.220 | -21.566 | 40.537 | 40.537 | 5.886  | 90.0 | 90.0 | 90.0  |
| 164 | I41MD   | 1.381 | -21.554 | 30.823 | 30.823 | 4.499  | 90.0 | 90.0 | 90.0  |
| 165 | P-6C2   | 0.973 | -21.451 | 13.624 | 13.624 | 28.310 | 90.0 | 90.0 | 120.0 |
| 166 | P42/NNM | 1.084 | -21.437 | 30.956 | 30.956 | 5.679  | 90.0 | 90.0 | 90.0  |
| 167 | P4232   | 1.152 | -21.336 | 19.734 | 19.734 | 19.734 | 90.0 | 90.0 | 90.0  |
| 168 | P63MC   | 0.998 | -20.948 | 29.332 | 29.332 | 5.950  | 90.0 | 90.0 | 120.0 |
| 169 | I-42M   | 1.233 | -20.917 | 27.122 | 27.122 | 6.505  | 90.0 | 90.0 | 90.0  |
| 170 | P42MC   | 1.164 | -20.916 | 20.780 | 20.780 | 5.869  | 90.0 | 90.0 | 90.0  |
| 171 | I4MM    | 0.998 | -20.841 | 31.729 | 31.729 | 5.874  | 90.0 | 90.0 | 90.0  |
| 172 | CMMA    | 1.397 | -20.839 | 30.499 | 23.847 | 5.809  | 90.0 | 90.0 | 90.0  |
| 173 | P432    | 0.900 | -20.566 | 21.427 | 21.427 | 21.427 | 90.0 | 90.0 | 90.0  |
| 174 | F23     | 0.881 | -20.483 | 27.186 | 27.186 | 27.186 | 90.0 | 90.0 | 90.0  |
| 175 | P4BM    | 1.290 | -20.411 | 18.937 | 18.937 | 6.378  | 90.0 | 90.0 | 90.0  |
| 176 | IMM2    | 1.369 | -20.098 | 15.340 | 23.719 | 5.924  | 90.0 | 90.0 | 90.0  |
| 177 | I-4M2   | 0.975 | -19.898 | 30.721 | 30.721 | 6.415  | 90.0 | 90.0 | 90.0  |
| 178 | I432    | 1.151 | -19.854 | 24.869 | 24.869 | 24.869 | 90.0 | 90.0 | 90.0  |
| 179 | P4/MNC  | 1.223 | -19.637 | 13.405 | 13.405 | 26.841 | 90.0 | 90.0 | 90.0  |
| 180 | P4/NBM  | 1.112 | -19.588 | 34.326 | 34.326 | 4.504  | 90.0 | 90.0 | 90.0  |
| 181 | P-4M2   | 1.130 | -19.586 | 21.126 | 21.126 | 5.851  | 90.0 | 90.0 | 90.0  |
| 182 | R-3M    | 0.996 | -19.571 | 58.032 | 58.032 | 4.571  | 90.0 | 90.0 | 120.0 |
| 183 | P-42M   | 0.979 | -19.545 | 22.784 | 22.784 | 5.804  | 90.0 | 90.0 | 90.0  |
| 184 | PMMN    | 1.343 | -19.481 | 17.098 | 28.750 | 4.469  | 90.0 | 90.0 | 90.0  |
| 185 | I4132   | 1.209 | -19.400 | 24.468 | 24.468 | 24.468 | 90.0 | 90.0 | 90.0  |
| 186 | P-62C   | 1.313 | -19.355 | 11.971 | 11.971 | 27.153 | 90.0 | 90.0 | 120.0 |
| 187 | P4/MCC  | 0.880 | -19.331 | 15.533 | 15.533 | 27.808 | 90.0 | 90.0 | 90.0  |
| 188 | P31M    | 1.210 | -19.057 | 18.155 | 18.155 | 6.410  | 90.0 | 90.0 | 120.0 |
| 189 | P6/M    | 1.117 | -18.956 | 16.810 | 16.810 | 16.196 | 90.0 | 90.0 | 120.0 |
| 190 | PMMA    | 1.295 | -18.236 | 29.925 | 16.888 | 4.509  | 90.0 | 90.0 | 90.0  |

|     |         |       |         |         |         |         |      |      |       |
|-----|---------|-------|---------|---------|---------|---------|------|------|-------|
| 191 | CMM2    | 1.309 | -18.042 | 17.156  | 29.567  | 4.444   | 90.0 | 90.0 | 90.0  |
| 192 | P4/M    | 1.191 | -17.901 | 12.355  | 12.355  | 16.236  | 90.0 | 90.0 | 90.0  |
| 193 | F4132   | 0.598 | -17.733 | 38.972  | 38.972  | 38.972  | 90.0 | 90.0 | 90.0  |
| 194 | P-3M1   | 0.777 | -17.659 | 38.027  | 38.027  | 4.549   | 90.0 | 90.0 | 120.0 |
| 195 | P4/NMM  | 1.026 | -17.649 | 35.807  | 35.807  | 4.486   | 90.0 | 90.0 | 90.0  |
| 196 | P-6     | 0.847 | -17.340 | 13.621  | 13.621  | 16.266  | 90.0 | 90.0 | 120.0 |
| 197 | P23     | 0.848 | -17.059 | 17.349  | 17.349  | 17.349  | 90.0 | 90.0 | 90.0  |
| 198 | FM-3    | 0.766 | -16.478 | 35.884  | 35.884  | 35.884  | 90.0 | 90.0 | 90.0  |
| 199 | PMM2    | 1.213 | -16.257 | 16.893  | 16.104  | 4.469   | 90.0 | 90.0 | 90.0  |
| 200 | P4MM    | 0.957 | -15.440 | 26.261  | 26.261  | 4.469   | 90.0 | 90.0 | 90.0  |
| 201 | P3M1    | 0.900 | -15.380 | 25.167  | 25.167  | 4.484   | 90.0 | 90.0 | 120.0 |
| 202 | P6MM    | 0.859 | -15.306 | 36.465  | 36.465  | 4.474   | 90.0 | 90.0 | 120.0 |
| 203 | I4/MCM  | 0.843 | -13.756 | 22.082  | 22.082  | 28.722  | 90.0 | 90.0 | 90.0  |
| 204 | FMMM    | 1.044 | -12.549 | 28.950  | 14.135  | 27.626  | 90.0 | 90.0 | 90.0  |
| 205 | I-43M   | 0.704 | -12.404 | 29.293  | 29.293  | 29.293  | 90.0 | 90.0 | 90.0  |
| 206 | P42/MNM | 1.047 | -12.226 | 19.536  | 19.536  | 14.764  | 90.0 | 90.0 | 90.0  |
| 207 | P42/MCM | 0.599 | -11.030 | 18.808  | 18.808  | 27.845  | 90.0 | 90.0 | 90.0  |
| 208 | P4/MBM  | 0.956 | -10.149 | 18.389  | 18.389  | 18.248  | 90.0 | 90.0 | 90.0  |
| 209 | IMMM    | 1.100 | -8.894  | 13.674  | 29.072  | 13.498  | 90.0 | 90.0 | 90.0  |
| 210 | P-43M   | 0.017 | -7.543  | 80.491  | 80.491  | 80.491  | 90.0 | 90.0 | 90.0  |
| 211 | P42/MMC | 0.249 | -7.481  | 29.473  | 29.473  | 27.262  | 90.0 | 90.0 | 90.0  |
| 212 | CMMM    | 0.361 | -6.868  | 48.917  | 14.521  | 22.987  | 90.0 | 90.0 | 90.0  |
| 213 | P-6M2   | 0.001 | -0.677  | 232.366 | 232.366 | 129.228 | 90.0 | 90.0 | 120.0 |
| 214 | P-62M   | 0.002 | -0.677  | 188.189 | 188.189 | 61.081  | 90.0 | 90.0 | 120.0 |
| 215 | P6/MMM  | 0.001 | -0.677  | 289.753 | 289.753 | 91.224  | 90.0 | 90.0 | 120.0 |
| 216 | PMMM    | 0.002 | -0.677  | 176.544 | 58.241  | 132.212 | 90.0 | 90.0 | 90.0  |
